# Supplementary material
Source: PubMed Central journal article supplement (PMC4231678)

Fig. S1

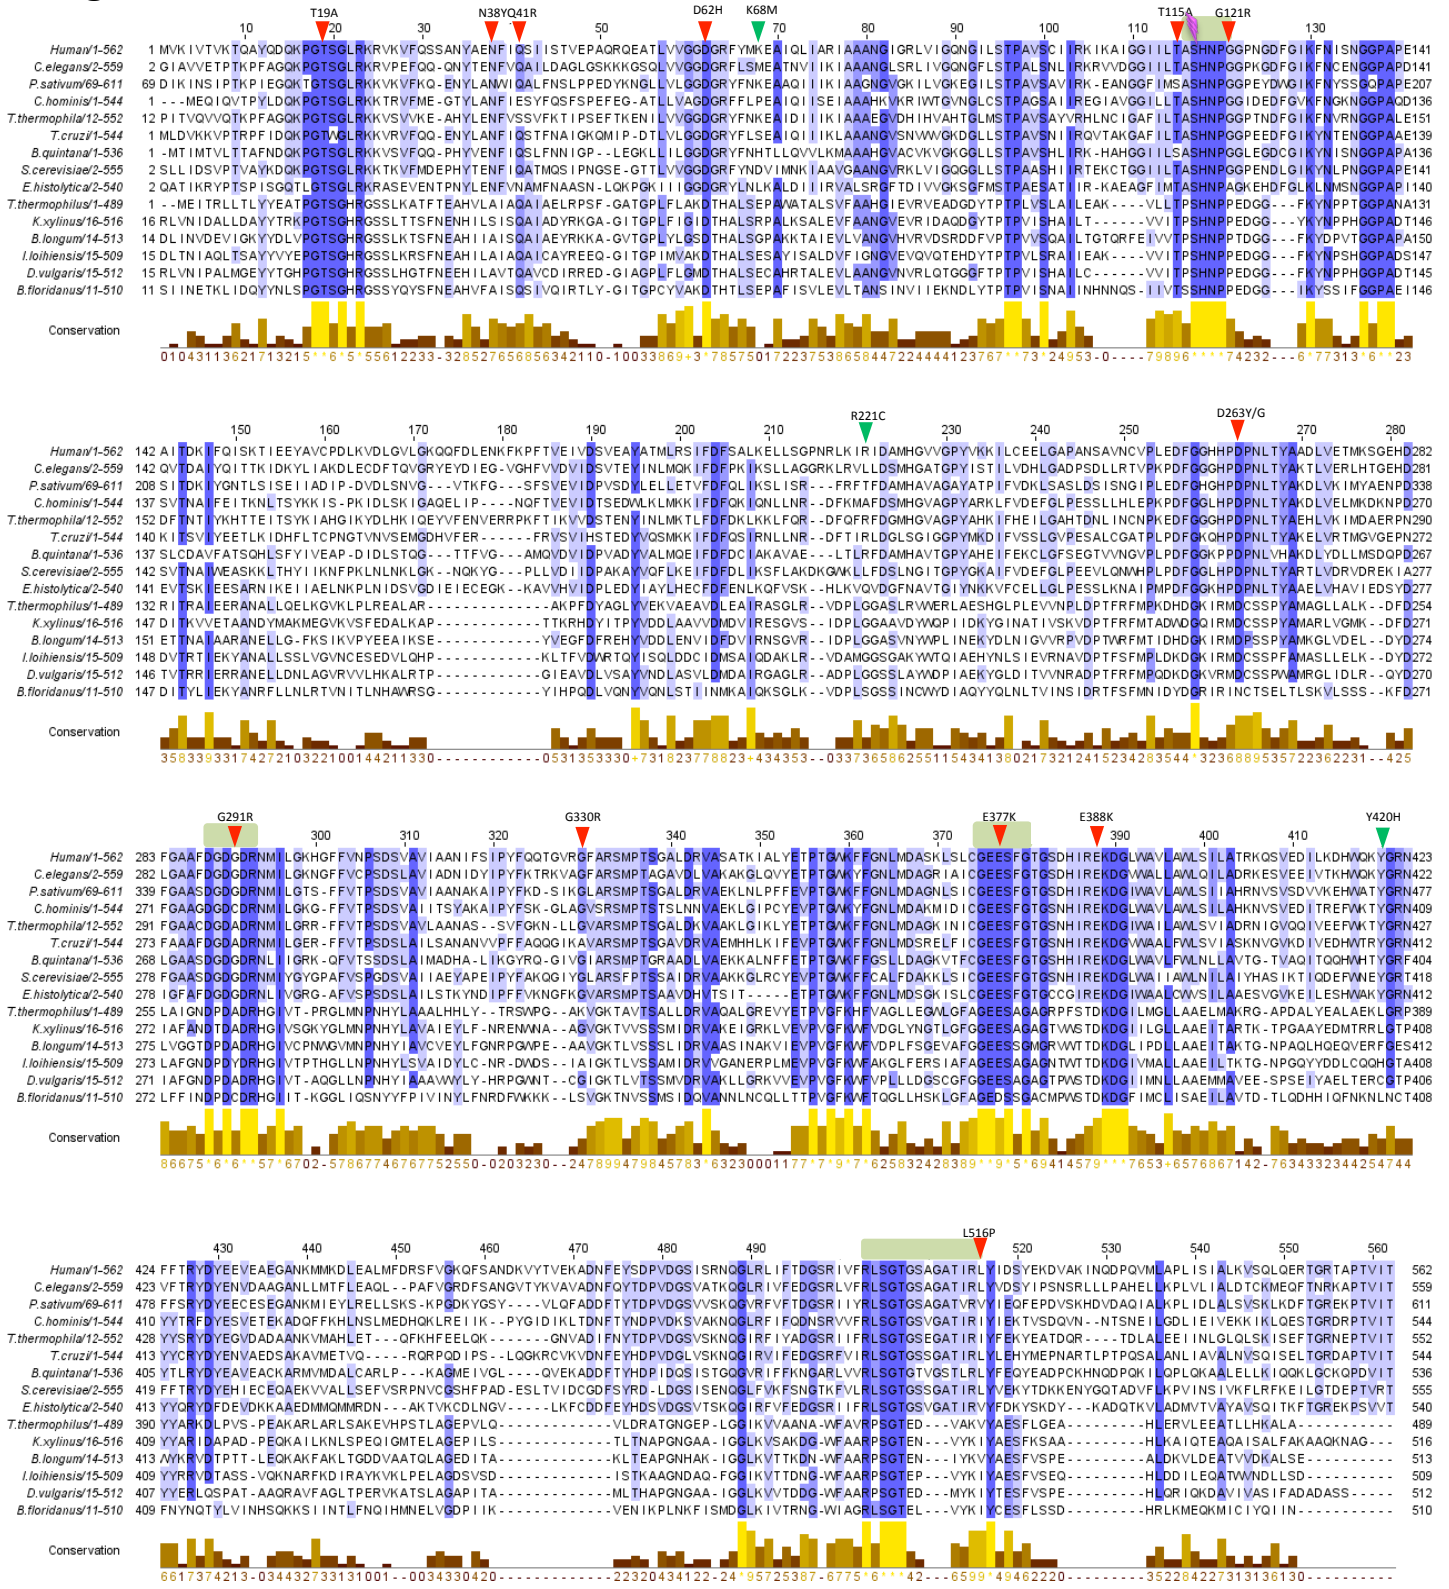

Supplement: supp_M114.597914_jbc.M114.597914-1.pdf [file supp_M114.597914_jbc.M114.597914-1.pdf]
